# Supplementary material for: Long-term retrospective observation reveals stabilities and variations of hantavirus infection in Hebei, China
Source: BMC Infect Dis. 2019 Sep 2;19:765. doi: 10.1186/s12879-019-4402-8 (PMC6721381; doi:10.1186/s12879-019-4402-8)
Supplement: Supplementary file 2 — Complete statistics of rodent density, virus-carrying rate and species composition of each surveillance points in Hebei province since 2007 to 2016. (XLSX 15 kb) [file 12879_2019_4402_MOESM2_ESM.xlsx]

## Sheet: Sheet1
Additional file 2. Rodent density, virus-carrying rate and species composition
Year	Surveillance points	Field									Residential area
		No. rattraps	No. rats	Density	Virus-carrying Rate	Rattus norvegicus	Mus musculus	Tscherskia triton	Apodemus agrarius	Other species	No. rattraps	No. rats	Density	Virus-carrying Rate	Rattus norvegicus	Mus musculus	Tscherskia triton	Apodemus agrarius	Other species
2007	Luan	1625	15	0.00923077	0	3	0	12	0	0	1852	59	0.0318575	0.0319149	59	0	0	0	0
	Xinji	1500	2	0.00133333	0	1	1	0	0	0	1000	13	0.013	0	9	4	0	0	0
	Dingzhou	1800	15	0.00833333	0	15	0	0	0	0	2100	15	0.00714286	0	15	0	0	0	0
	Xian	2424	12	0.0049505	0	0	0	12	0	0	800	12	0.015	0	8	4	0	0	0
2008	Luan	1200	8	0.00666667	0	1	2	5	0	0	1760	68	0.0386364	0.00595238	66	0	0	0	2
	Xinji	1200	3	0.0025	0	3	0	0	0	0	800	7	0.00875	0	7	0	0	0	0
	Dingzhou	2700	30	0.0111111	0	29	0	1	0	0	1800	14	0.00777778	0	14	0	0	0	0
	Xian	2400	7	0.00291667	0	0	0	7	0	0	800	20	0.025	0	3	17	0	0	0
2009	Luan	1200	9	0.0075	0	0	0	9	0	0	1800	79	0.0438889	0	79	0	0	0	0
	Xinji	1200	6	0.005	0	6	0	0	0	0	800	6	0.0075	0	3	3	0	0	0
	Dingzhou	3000	23	0.00766667	0	22	0	1	0	0	1800	16	0.00888889	0.0288462	16	0	0	0	0
	Xian	2400	12	0.005	0	0	0	12	0	0	800	8	0.01	0	4	4	0	0	0
2010	Luan	1000	0	0	0	0	0	0	0	0	1100	48	0.0436364	0.0232558	48	0	0	0	0
	Xinji	12700	42	0.00330709	0	25	17	0	0	0	8500	70	0.00823529	0	29	41	0	0	0
	Dingzhou	1825	14	0.00767123	0.0227	14	0	0	0	0	1170	26	0.0222222	0	13	13	0	0	0
	Xian	1650	11	0.00666667	0	0	0	11	0	0	500	12	0.024	0.0178571	7	5	0	0	0
2011	Luan	2800	0	0	0	0	0	0	0	0	5600	153	0.0273214	0.0625	142	11	0	0	0
	Xinji	1500	7	0.00466667	0	6	1	0	0	0	1400	48	0.0342857	0.0169492	43	5	0	0	0
	Dingzhou	3000	4	0.00133333	0	3	1	0	0	0	2100	36	0.0171429	0.0160428	35	1	0	0	0
	Xian	2400	14	0.00583333	0	0	0	5	0	9	800	5	0.00625	0.0107527	3	2	0	0	0
2012	Luan	400	0	0	0	0	0	0	0	0	412	37	0.0898058	0.0765306	34	3	0	0	0
	Xinji	1400	28	0.02	0	26	2	0	0	0	3400	169	0.0497059	0.00645161	143	26	0	0	0
	Dingzhou	2400	3	0.00125	0	3	0	0	0	0	1800	17	0.00944444	0.0168067	15	2	0	0	0
	Xian	2400	36	0.015	0	0	0	36	0	0	1600	21	0.013125	0	12	9	0	0	0
2013	Luan	1000	0	0	0	0	0	0	0	0	1400	30	0.0214286	0.150602	27	3	0	0	0
	Xinji	1700	21	0.0123529	0	18	3	0	0	0	3400	125	0.0367647	0	99	26	0	0	0
	Dingzhou	2400	12	0.005	0	8	0	4	0	0	3300	83	0.0251515	0	70	9	0	0	4
	Xian	2000	13	0.0065	0	1	0	9	3	0	1200	11	0.00916667	0	8	3	0	0	0
2014	Luan	1600	0	0	0	0	0	0	0	0	1600	13	0.008125	0.166667	12	1	0	0	0
	Xinji	1800	21	0.0116667	0	19	2	0	0	0	3600	147	0.0408333	0.0208333	115	32	0	0	0
	Dingzhou	1200	3	0.0025	0	3	0	0	0	0	2700	43	0.0159259	0.0155039	37	6	0	0	0
	Xian	1600	3	0.001875	0	0	0	0	0	3	1200	35	0.0291667	0.037037	34	1	0	0	0
2015	Luan	200	0	0	0	0	0	0	0	0	600	9	0.015	0	9	0	0	0	0
	Xinji	800	13	0.01625	0	13	0	0	0	0	1600	89	0.055625	0	76	13	0	0	0
	Dingzhou	3530	10	0.00283286	0	10	0	0	0	0	4040	69	0.0170792	0.0144928	69	0	0	0	0
	Xian	800	3	0.00375	0	0	0	3	0	0	800	15	0.01875	0	15	0	0	0	0
	Guantao	894	33	0.0369128	0	33	0	0	0	0	426	18	0.0422535	0	12	6	0	0	0
	Kuancheng	200	0	0	0	0	0	0	0	0	600	51	0.085	0	47	4	0	0	0
2016	Luan	800	0	0	0	0	0	0	0	0	3000	63	0.021	0	63	0	0	0	0
	Xinji	1600	11	0.006875	0	11	0	0	0	0	3200	136	0.0425	0	105	31	0	0	0
	Dingzhou	7550	20	0.00264901	0	20	0	0	0	0	10520	110	0.0104563	0	110	0	0	0	0
	Xian	2400	6	0.0025	0	4	0	0	0	2	2400	86	0.0358333	0	56	30	0	0	0
	Guantao	569	1	0.00175747	0	1	0	0	0	0	1419	102	0.0718816	0.00980392	75	27	0	0	0
	Kuancheng	600	0	0	0	0	0	0	0	0	1100	56	0.0509091	0.0357143	56	0	0	0	0
